# Supplementary material
Source: PubMed Central journal article supplement (PMC7393259)
Supplement: bloodBLD2019003940-suppl1.pdf [file bloodBLD2019003940-suppl1.pdf]

**Table S1. Primer Sequences**

| <b>Primers for genomic DNA</b>        | <b>Sequences</b>          |
|---------------------------------------|---------------------------|
| SoNar-F                               | GGGGCGGCGTGATCGAGCACG TAG |
| SoNar-R                               | GCTTCTCGTTGGGGTCTTTGCTCAG |
| Actin-F                               | AGTCCCTCACCTCCCAAAA       |
| Actin-R                               | CAGACCTGGGCCATTCAGAAA     |
| <b>Primers for RT-PCR and qRT-PCR</b> | <b>Sequences</b>          |
| Ldha-F                                | TGTCTCCAGCAAAGACTACTGT    |
| Ldha-R                                | GACTGTACTTGACAATGTTGGGA   |
| Pkm2-F                                | ATTACCAGCGACCCACAGA       |
| Pkm2-R                                | ACTTGGTGAGCACTCCTGC       |
| Glut1-F                               | CAGTTCGGCTATAACACTGGTG    |
| Glut1-R                               | GCCCCGACAGAGAAGATG        |
| Glut2-F                               | TCAGAAGACAAGATCACCGGA     |
| Glut2-R                               | GCTGGTGTGACTGTAAGTGGG     |
| Glut3-F                               | ATGGGGACAACGAAGGTGAC      |
| Glut3-R                               | GTCTCAGGTGCATTGATGACTC    |
| Glut4-F                               | GTGACTGGAACACTGGTCCTA     |
| Glut4-R                               | CCAGCCACGTTGCATTGTAG      |
| Hk1-F                                 | CGGAATGGGGAGCCTTTGG       |
| Hk1-R                                 | GCCTTCCTTATCCGTTTCAATGG   |
| Pfkl-F                                | GGAGGCGAGAACATCAAGCC      |
| Pfkl-R                                | CGGCCTTCCCTCGTAGTGA       |
| Pkm2-F                                | TGTGGTCCGAGTTGGTATCTT     |
| Pkm2-R                                | GCACTTCCAATCACTGTGCC      |
| Gapdh-F                               | AGGTCGGTGTGAACGGATTTG     |
| Gapdh-R                               | TGTAGACCATGTAGTTGAGGTCA   |
| Mct1-F                                | TGTTAGTCGGAGCCTTCATTTT    |
| Mct1-R                                | CACTGGTTCGTTGCACTGAATA    |
| Mct2-F                                | GCTGGTTCG TAGTCTGTGC      |
| Mct2-R                                | ATCCAAGCGATCTGACTGGAG     |
| Mct3-F                                | TCACGGGTTTCTCCTACGC       |
| Mct3-R                                | GCCAAAGCGGTTACACAC        |
| Mct5-F                                | CCTTACACCAAACCCCTTGATG    |
| Mct5-R                                | CCAATCCAACCAATTTGCTCTG    |
| Mpc1-F                                | ATGAGTACGCACTTCTGGGG      |
| Mpc1-R                                | CGCCCACTGATAATCTCTGGA     |
| Mpc2-F                                | TACCACCGACTCATGGATAAAGT   |
| Mpc2-R                                | CACACACCAATCCCCATTTCA     |
| Pdhx-F                                | GCTTCACTGTAACCAGCCG       |
| Pdhx-R                                | CCCTTGCTCCATCGTAGGAGA     |
| Fh1-F                                 | GAATGGCAAGCCAAAATTCCTT    |
| Fh1-R                                 | CGTTCCGTAGCACCTCCAATCTT   |

|          |                           |
|----------|---------------------------|
| ldh1-F   | ATGCAAGGAGATGAAATGACACG   |
| ldh1-R   | GCATCACGATTCTCTATGCCTAA   |
| ldh2-F   | GGAGAAGCCGGTAGTGGAGAT     |
| ldh2-R   | GGTCTGGTCACGGTTTGGAA      |
| ldh3a-F  | TGGGTGTCCAAGGTCTCTC       |
| ldh3a-R  | CTCCCACTGAATAGGTGCTTTG    |
| ldh3b-F  | TGGAGAGGTCTCGGAACATCT     |
| ldh3b-R  | AGCCTTGAACACTTCCTTGAC     |
| ldh3g-F  | GGTGCTGCAAAGGCAATGC       |
| ldh3g-R  | TATGCCGCCACCATACTTAG      |
| Aco2-F   | ATCGAGCGGGGAAAGACATAC     |
| Aco2-R   | TGATGGTACAGCCACCTTAGG     |
| Atp5l-F  | GAGAAGGCACCGTCGATGG       |
| Atp5l-R  | ACACTCTGAATAGCTGTAGGGAT   |
| Atp5o-F  | TCTCGACAGGTTTCGGAGCTT     |
| Atp5o-R  | AGAGTACAGGGCGGTTGCATA     |
| Cox6b1-F | ACTACCTGGACTTCCACCG       |
| Cox6b1-R | ACCCATGACACGGGACAGA       |
| Cox18-F  | GGCCGCCTATCAGCACTAC       |
| Cox18-R  | TGAGATAAGTCTCCGCATGTTCT   |
| Ndufb5-F | CAAGAGACTGTTTGTTCGTCGAAGC |
| Ndufb5-R | TGTTCCACCAGTGTTATGCCAAT   |
| Gdpd-F   | CACAGTGGACGACATCCGAAA     |
| Gdpd-R   | AGCTACATAGGAATTACGGGCAA   |
| Pgd-F    | TGAAGGGTCCTAAGGTGGTCC     |
| Pgd-R    | CCGCCATAATTGAGGGTCCAG     |
| Gls-F    | TTCGCCCTCGGAGATCCTAC      |
| Gls-R    | CCAAGCTAGGTAACAGACCCT     |
| Gdh-F    | CCCAACTTCTTCAAGATGGTGG    |
| Gdh-R    | AGAGGCTCAACACATGGTTGC     |
| Phgdh-F  | ATGGCCTTCGCAAATCTGC       |
| Phgdh-R  | AGTTCAGCTATCAGCTCCTCC     |
| Actin-F  | GGCTGTATTCCCCTCCATCG      |
| Actin-R  | CCAGTTGGTAACAATGCCATGT    |
| SoNar-F  | GGGGCGGCGTGATCGAGCACGTAG  |
| SoNar-R  | GCTTCTCGTTGGGGTCTTTGCTCAG |
| mt-ND4-F | GGAACCAAACCTGAACGCCTA     |
| mt-ND4-R | ATGAGGGCAATTAGCAGTGG      |
| B2m-F    | TCATTAGGGAGGAGCCAATG      |
| B2m-R    | ATCCCCTTTCGTTTTTGGCTT     |
| Mdh1-F   | AGATTGCCTTCAAAGACCTGG     |
| Mdh1-R   | GCAGTTTCGTATTGGCTGGGT     |
| Mdh2-F   | TTGGGCAACCCCTTTCCTC       |
| Mdh2-R   | GCCTTTCACATTTGCTCTGGTC    |

|                                |                            |
|--------------------------------|----------------------------|
| SoNar-F                        | CGGCTGGGCAGCGCCCTGGC       |
| SoNar-R                        | GCCGGGCACCGCTGGGGCA        |
| <b>shRNA for Mdh1 and Mdh2</b> | <b>Target sequences</b>    |
| shMdh1#1                       | GCCCATCATTCTTGTGCTGTT      |
| shMdh1#2                       | CTTGGAGAAATACGCCAAGAA      |
| shMdh1#3                       | CCAAGGTGAAACTGCAAGGAA      |
| shMdh2#1                       | GCAGAGCTAAAGGGTTTGGAT      |
| shMdh2#2                       | CGGAATGCACTTACTTCTCTA      |
| shMdh2#3                       | CGGTGTGTACAACCCTAACAA      |
| <b>ChIP for Mdh1</b>           | <b>Sequences</b>           |
| ChIP-Mdh1-F                    | CTTCTTGGCTTTGTGAGGCC       |
| ChIP-Mdh1-R                    | TGGTGGTCTGGTGAGTAATT       |
| <b>MSP PCR primer for Mdh1</b> | <b>Sequences</b>           |
| MDH1-MSP-1-F                   | GTTTTTGATATTAATAGGGGATTT   |
| MDH1-MSP-1-R                   | CCAAAACTTATAAACTATATTCTCAC |

# Figure S1

## A

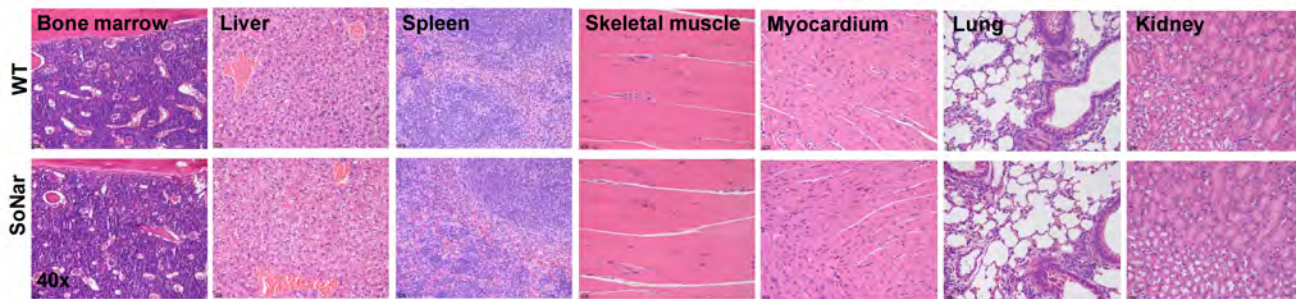

## B

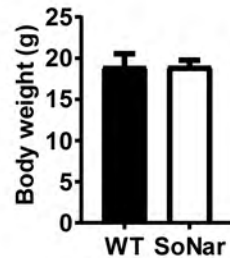

## C

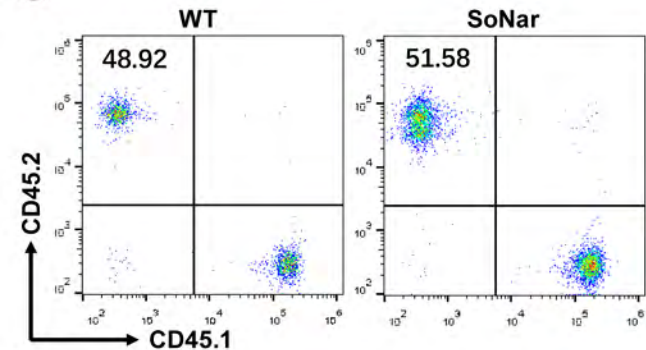

## D

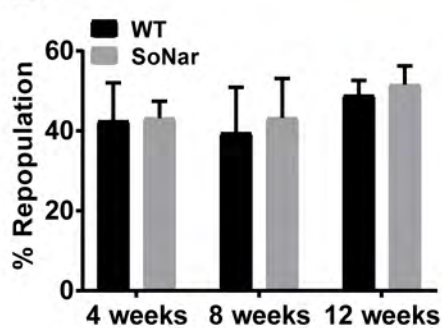

## E

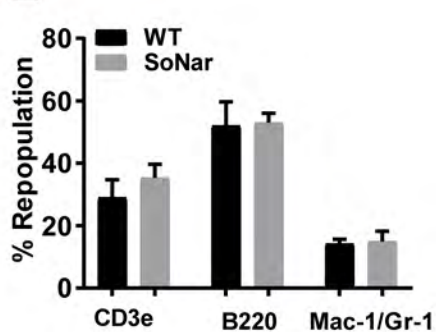

**Figure S1, related to Figure 1.** (A) Pathologic status was evaluated in different tissues of WT and SoNar transgenic mice by hematoxylin/eosin staining. Scale bar: 50  $\mu$ m. (B) Body weight was examined in both 6-8 weeks WT and SoNar transgenic mice (n=10). (C) Representative flow cytometric plots of the frequencies of repopulated cells in the peripheral blood of recipients transplanted with WT and SoNar transgenic adult-HSC donor (CD45.2) or competitive cells (CD45.1). (D) Quantification of data of the repopulated donor cells at 4, 8 and 12 weeks post-transplant in panel C (n=5). (E) Multilineage contribution of donor cells in the primary recipients at 12 weeks post-transplant in panel D (n=5). Data are represented as mean  $\pm$  SEM. Student's two-tailed unpaired t test (B) or two-way ANOVA with Sidak's multiple comparison test (D and E) was used for the comparison of statistical significance.

# Figure S2

## A

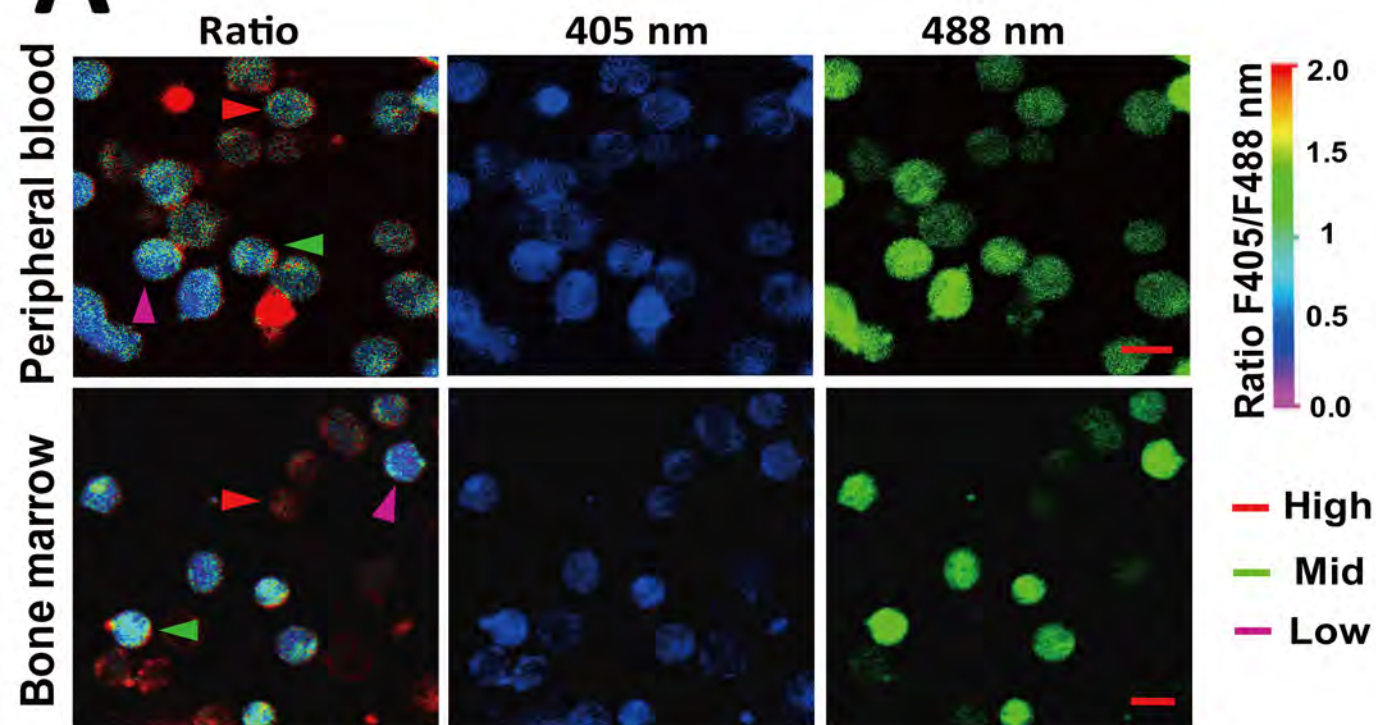

## B

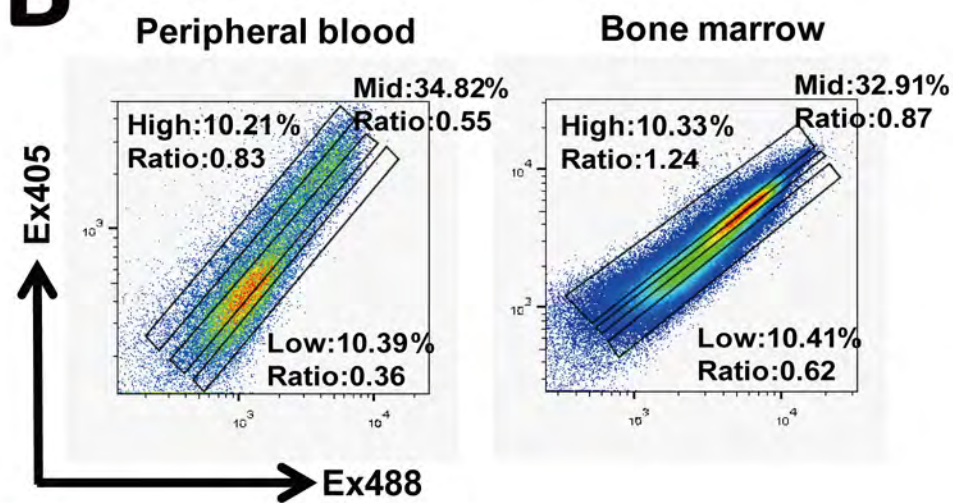

## C

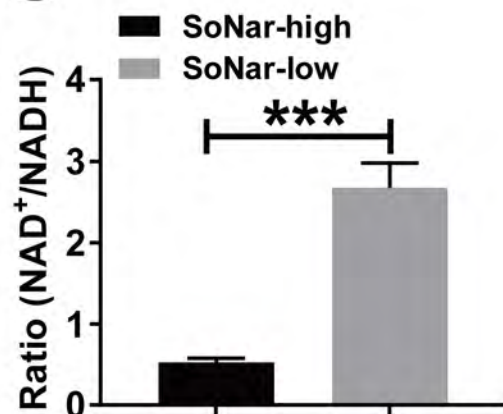

## D

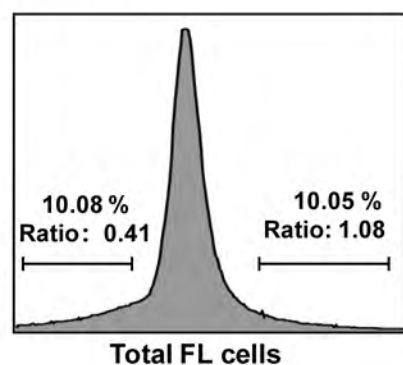

## E

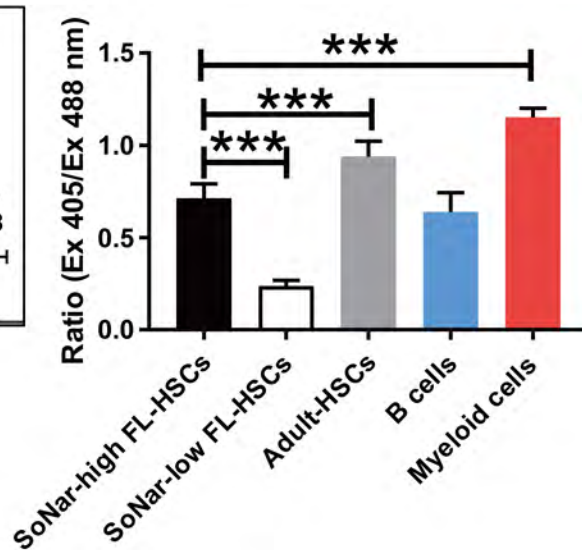

## F

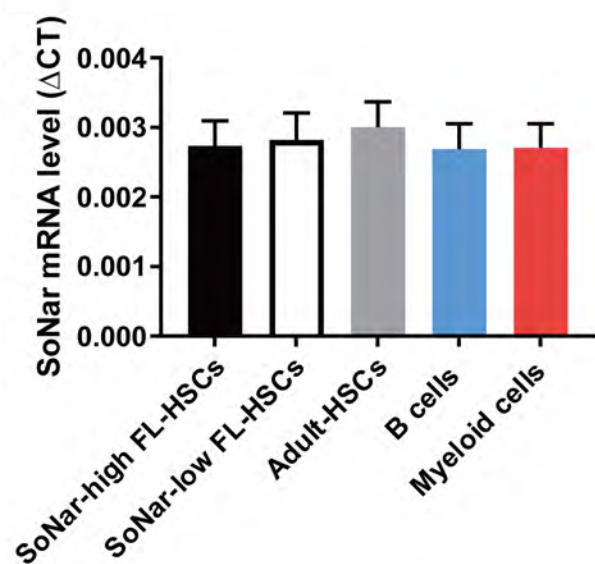

**Figure S2, related to Figure 2.** (A) Peripheral blood and bone marrow cells from SoNar transgenic mice were evaluated for the ratios of SoNar fluorescence with excitation at 405 and 488 nm by confocal microscopy, and representative images are shown. Scale bar: 10  $\mu$ m. (B) Representative flow cytometric analyses of the ratios of SoNar fluorescence in peripheral blood and bone marrow CD45<sup>+</sup> hematopoietic cells. Frequencies and Ratios of SoNar-high, -middle (mid) and -low FL hematopoietic cells are indicated. (C) NAD<sup>+</sup>/NADH levels were determined in SoNar-high and -low FL hematopoietic cells by using a commercial available NADH/NAD<sup>+</sup> assay kit and the ratio was calculated (n=5). (D) Representative flow cytometric analyses (histogram) of ratios of SoNar fluorescence (F405/F488 nm) in total FL hematopoietic cells. (E-F) The ratios of SoNar fluorescence (E) and relative SoNar mRNA expression levels (F) were determined in FL-high-HSCs, FL-low-HSCs, adult-HSCs, differentiated B cells and myeloid cells in the BM (n=3-5). Data are represented as mean  $\pm$  SEM. Student's two-tailed unpaired t test (C) or and one-way ANOVA with Tukey's multiple comparison test (E and F) were used for the comparison of statistical significance. \*\*\*, p<0.001.

# Figure S3

## A

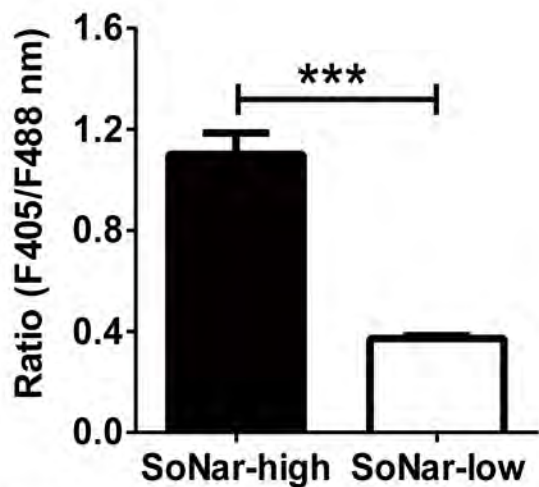

## B

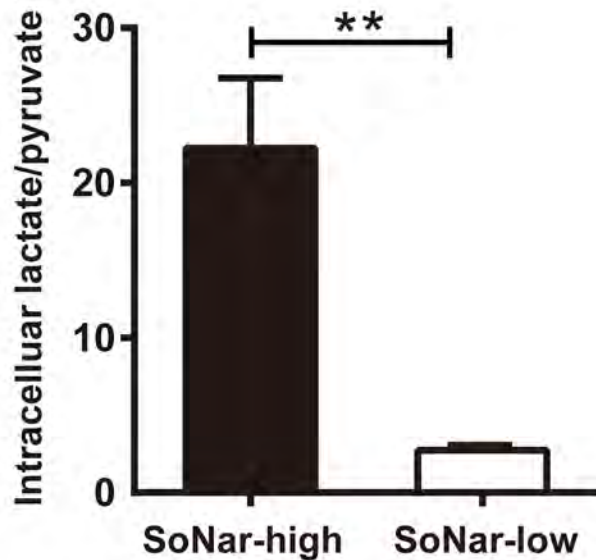

## C

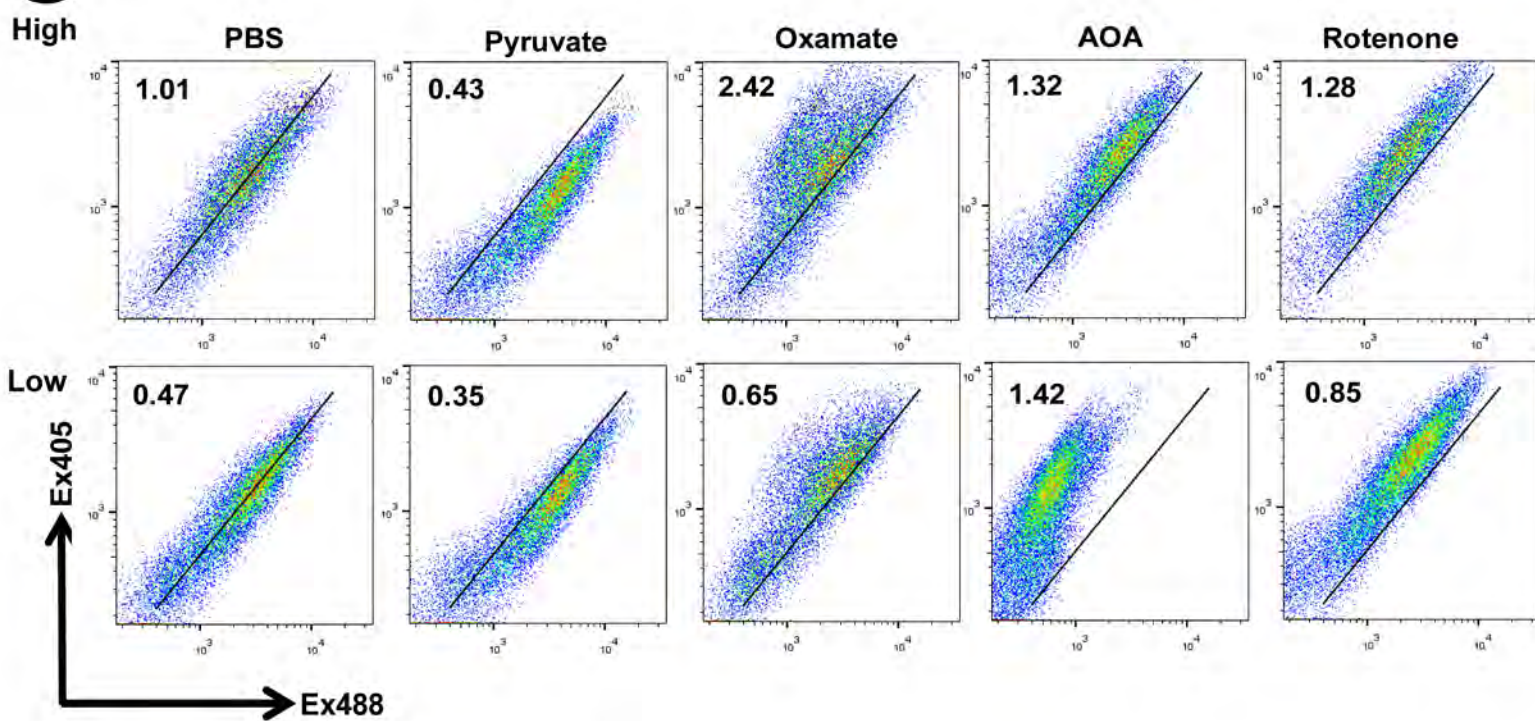

## D

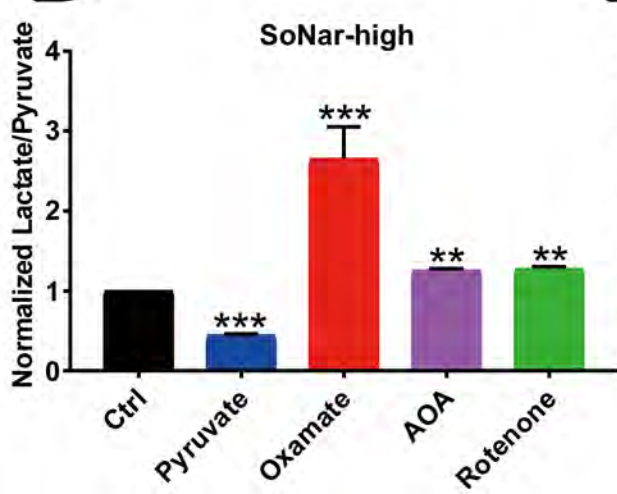

## E

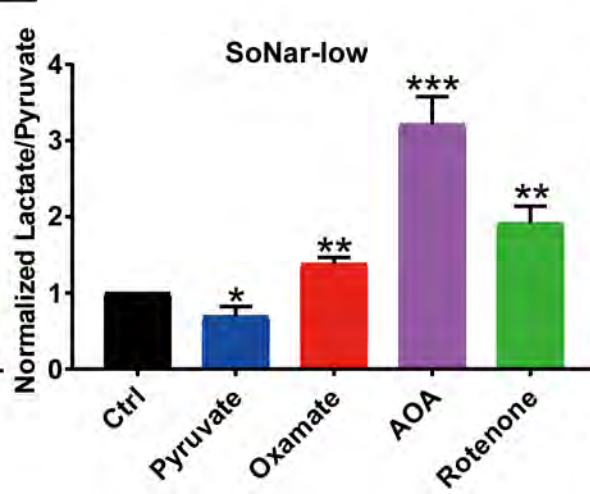

## F

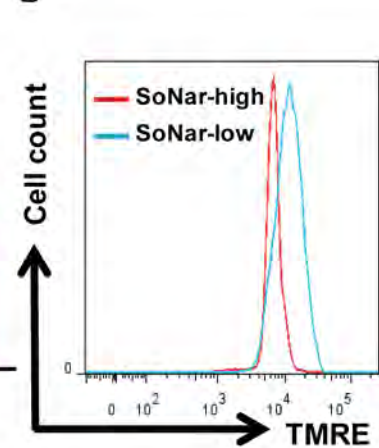



**Figure S3, related to Figure 3.** (A) Quantification of the ratios of SoNar fluorescence (F405/F488 nm) of CD45<sup>+</sup> SoNar-high and -low FL hematopoietic cells in Figure 3A as measured by flow cytometric analysis (n=6) (B) Intracellular lactate and pyruvate in CD45<sup>+</sup> SoNar-high and -low FL hematopoietic cells were measured and normalized to pyruvate (n=3). (C) Representative flow cytometric analyses of the ratios of SoNar fluorescence in CD45<sup>+</sup> SoNar-high and -low FL hematopoietic cells upon PBS, pyruvate, oxamate, AOA or rotenone treatment. (D and E) Intracellular lactate and pyruvate in CD45<sup>+</sup> SoNar-high (D) and -low FL hematopoietic cells (E) were measured and normalized to PBS upon pyruvate, oxamate, AOA, or rotenone incubation. (F) Mitochondrial membrane potential was evaluated in CD45<sup>+</sup> SoNar-high and -low FL hematopoietic cells by staining with TMRE probe. Data are represented as mean  $\pm$  SEM. Student's two-tailed unpaired t test (A and B), and one-way ANOVA with Tukey's multiple comparison test (D and E) were used for the comparison of statistical significance. \*, p<0.05; \*\*, p<0.01; \*\*\*, p<0.001.

**Figure S4**

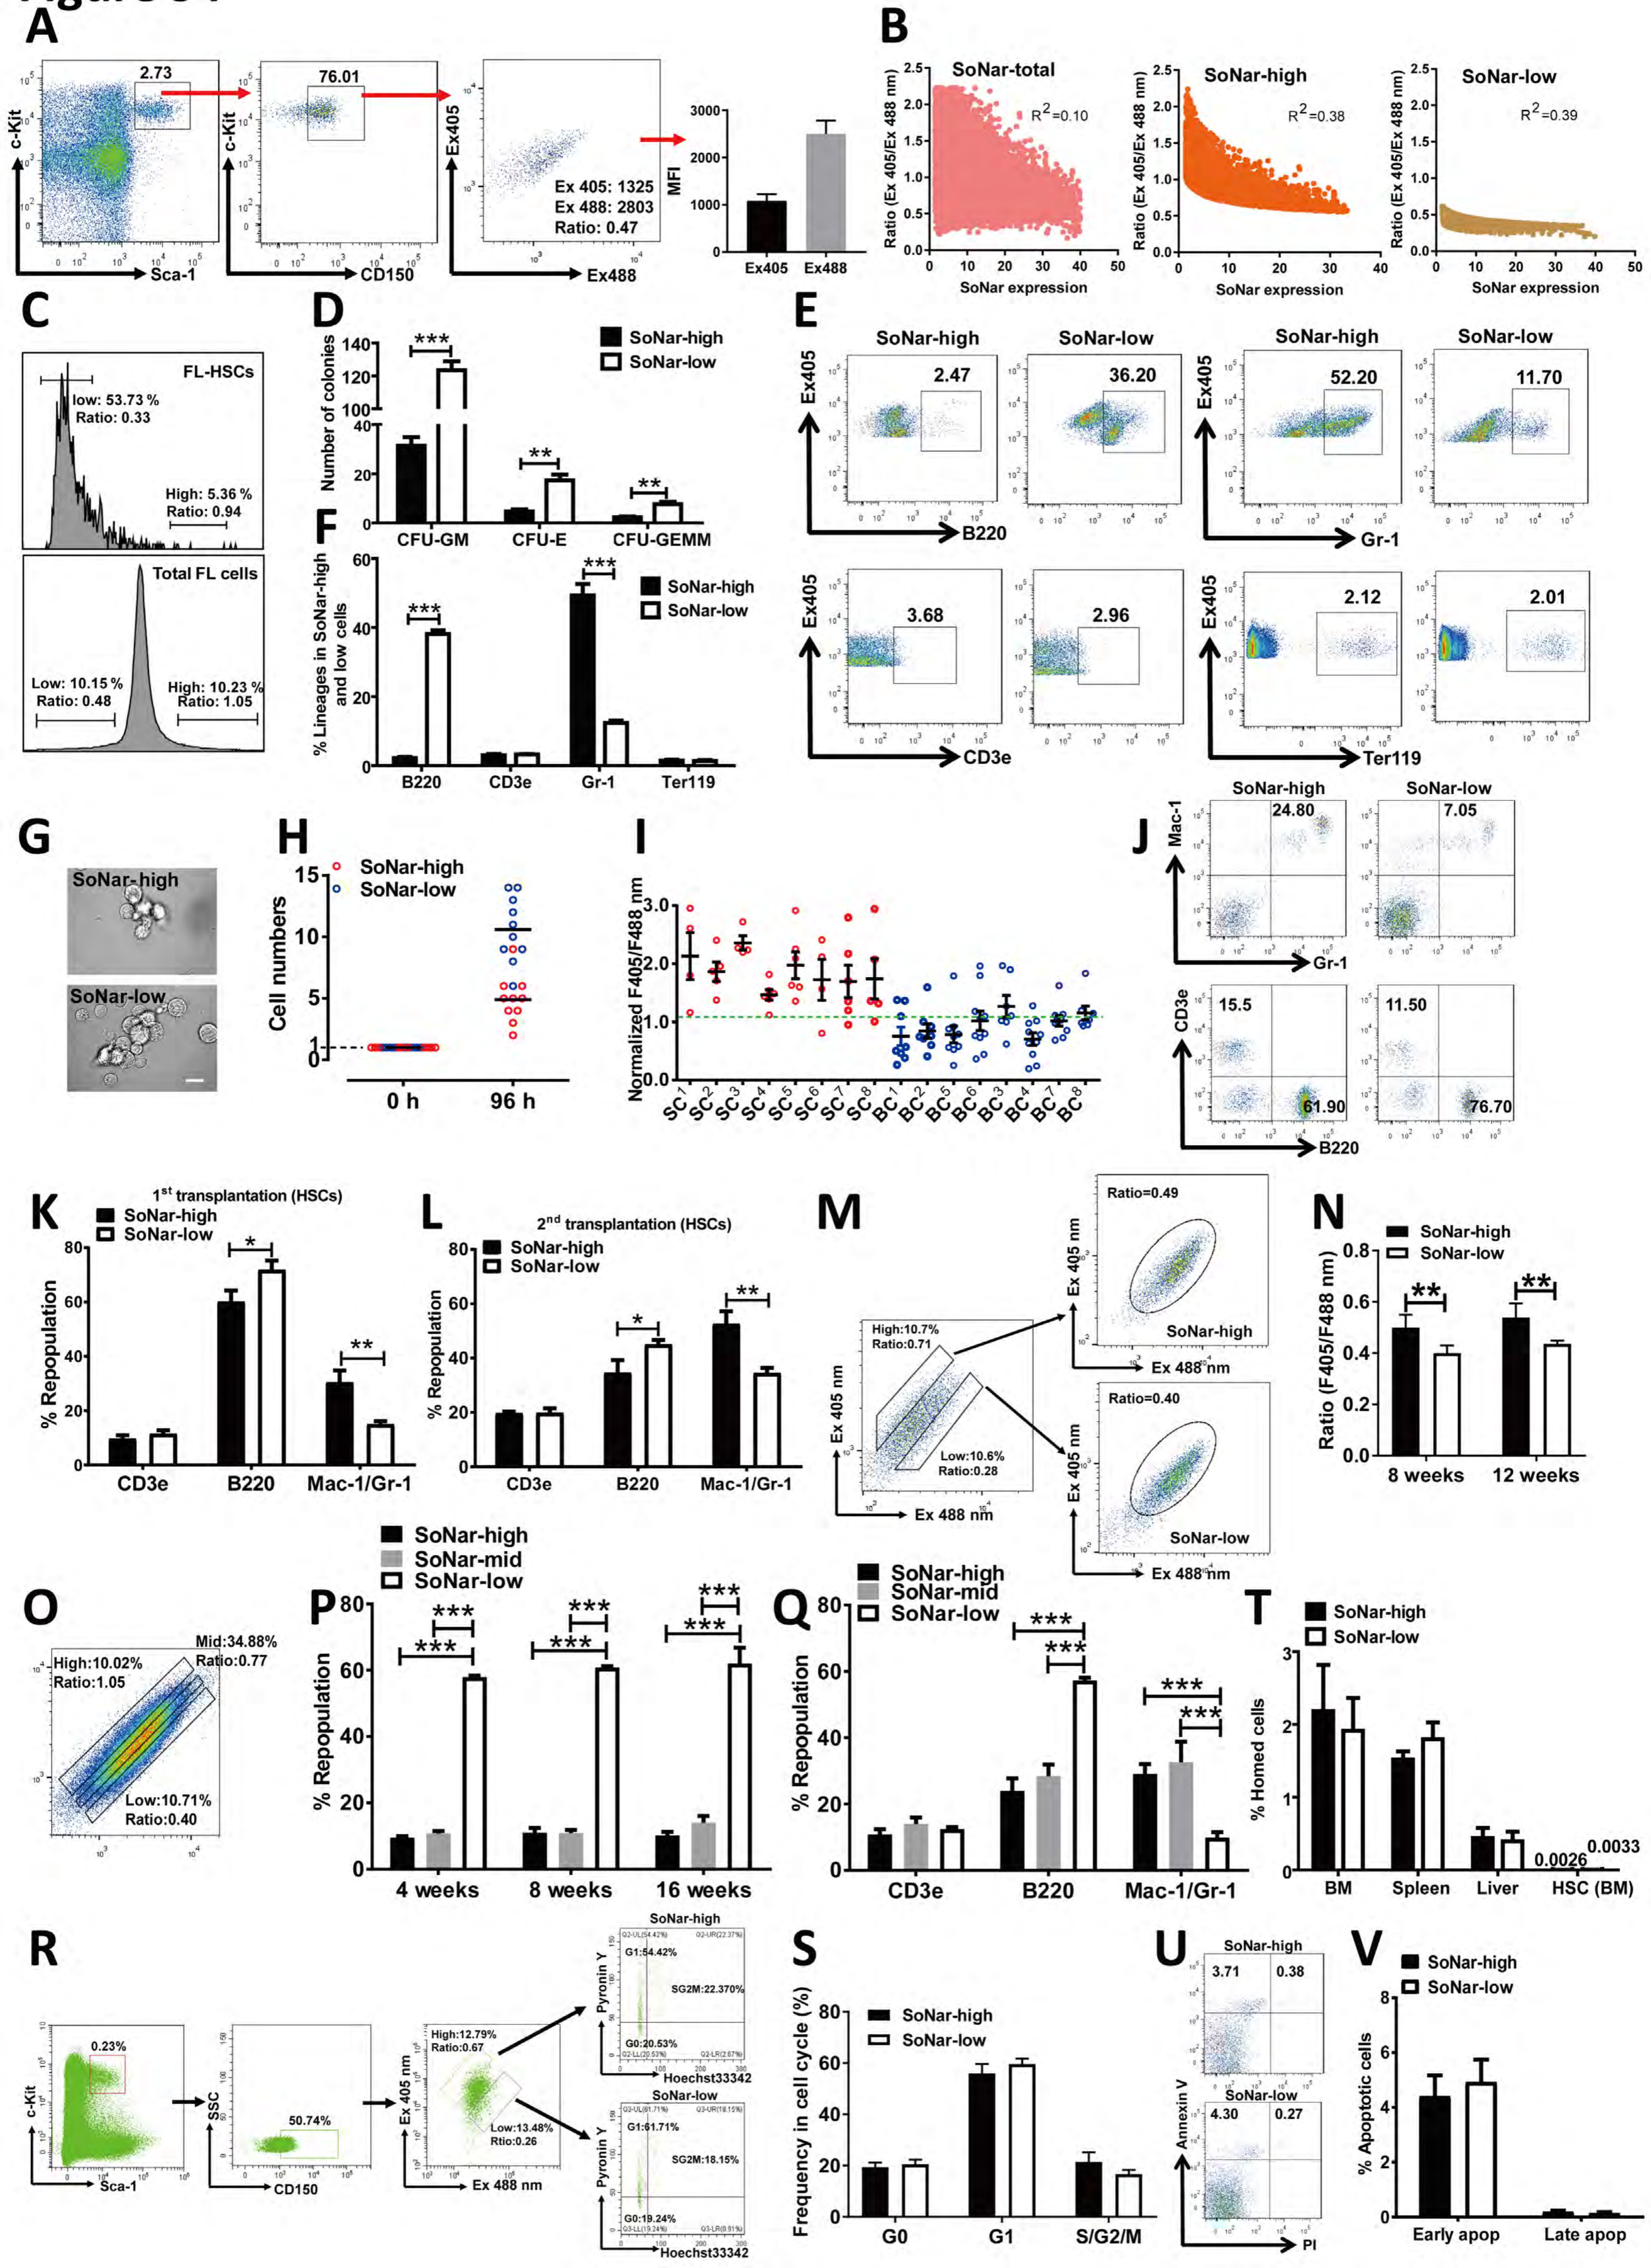

**Figure S4, related to Figure 4.** (A) Immunophenotypic Lin<sup>-</sup>Sca-1<sup>+</sup>c-Kit<sup>+</sup>CD150<sup>+</sup>CD48<sup>-</sup> FL-HSCs were gated and subjected for the analysis of the ratios of SoNar fluorescence. The mean fluorescence intensity (MFI) at excitation of 405 and 488 were quantified (n=5). (B) The coefficient of determination between SoNar fluorescence ratios (F405/F488) and its expression levels in total SoNar FL hematopoietic cells (Left), SoNar-high cells (Middle), and SoNar-low cells (Right). Data are from panel Figure 4A. SoNar expression levels are calculated using weighted average fluorescence excited at 405 nm and 488nm. Approximately 16,000 FL hematopoietic cells are used for the analysis. (C) Representative flow cytometric analyses (histogram) of ratios of SoNar fluorescence (F405/F488 nm) in total CD45<sup>+</sup> FL hematopoietic cells and FL-HSCs. (D) Frequencies of functional progenitor cells, as indicated as CFU-GEMM, CFU-GM, and CFU-E, were evaluated in CD45<sup>+</sup> SoNar-high and -low FL hematopoietic cells using the methylcellulose medium M3434 (n=3). (E) Representative flow cytometric analyses of percentages of B cells (B220<sup>+</sup>), myeloid cells (Gr-1<sup>+</sup>), T cells (CD3e<sup>+</sup>), and erythroid cells (Ter119<sup>+</sup>) in CD45<sup>+</sup> SoNar-high and -low FL cells. (F) Quantification of percentages of lineage cells in panel E (n=5). (G and H) Representative images of the colonies (G) or total cell numbers (H) derived from a single CD45<sup>+</sup> SoNar-high and -low FL hematopoietic cell (E12.5 ) 96 h after culture. A total of 10 cells were cultured (n=3). Scale bar: 10 μm. (I) The overall ratios of SoNar fluorescence were evaluated in big colonies (BC) and small colonies (SC) derived from a single cell 96 h after culture (n=3). (J) Representative flow cytometric analyses of frequencies of donor derived myeloid cells (Mac-1<sup>+</sup>Gr-1<sup>+</sup>), B cells (B220<sup>+</sup>), and T cells (CD3e<sup>+</sup>) in the primary

transplantation. **(K and L)** Multilineage contribution of donor cells in the primary or secondary recipients receiving SoNar-high or SoNar-low FL-HSCs at 16 weeks post-transplant (n=5). **(M-N)** Representative flow cytometric analyses of the ratios of SoNar fluorescence from FL-high and -low HSCs and their repopulated hematopoietic cells in the peripheral blood of the recipient mice (M). Quantification data of the SoNar ratios in repopulated cells in panel M (N, n=5). **(O-Q)** CD45<sup>+</sup> SoNar-high, -middle (mid) and -low FL hematopoietic cells were sorted for the competitive transplantation (O), followed by the analysis for the repopulated donor cells in recipients at indicated time points (P). Multilineage contribution of donor cells were determined at 16 weeks post-transplant (Q, n=5). **(R-S)** Representative flow cytometric analyses of the cell cycle status in immunophenotypic Lin<sup>-</sup>Sca-1<sup>+</sup>c-Kit<sup>+</sup>CD150<sup>+</sup>CD48<sup>-</sup> SoNar-high and -low FL-HSCs (R). Quantification data of the frequencies of G0, G1 and S/G2/M phases in panel R are shown (S, n=4). **(T)** Frequencies of SoNar<sup>+</sup> cells in the BM, spleen and liver, and HSCs (SoNar<sup>+</sup> Lin<sup>-</sup>Sca-1<sup>+</sup>c-Kit<sup>+</sup>CD150<sup>+</sup>CD48<sup>-</sup> cells) in the BM were determined in recipient mice 16 h after receiving CD45<sup>+</sup> SoNar-high and -low FL hematopoietic cells (n=5). **(U)** Representative flow cytometric analyses of percentages of early and late apoptotic cells in CD45<sup>+</sup> SoNar-high and -low FL hematopoietic cell populations. **(V)** Quantification data of apoptosis in CD45<sup>+</sup> SoNar-high and -low FL hematopoietic cells in panel U. Early and late apoptotic cells were defined as Annexin V<sup>+</sup>PI<sup>-</sup> and Annexin V<sup>+</sup>PI<sup>+</sup> cells, respectively (n=5). Data are represented as mean ± SEM. Two-way ANOVA with Sidak's multiple comparison test was used for the comparison of statistical significance. \*, p<0.05; \*\*, p<0.01; \*\*\*, p<0.001.



**Figure S5, related to Figure 5.** (A and B) Representative flow cytometric analyses of immunophenotypic Lin<sup>-</sup>Sca-1<sup>+</sup>c-Kit<sup>+</sup>CD150<sup>+</sup>CD48<sup>-</sup> LT-HSCs in SoNar-high, -mid and -low BM hematopoietic cell populations according to the ratios of SoNar fluorescence (A). Quantification of frequencies of LT-HSCs is shown (B, n=3). (C) Immunophenotypic Lin<sup>-</sup>Sca-1<sup>+</sup>c-Kit<sup>+</sup>CD150<sup>+</sup>CD48<sup>-</sup> adult-HSCs were gated and subjected for the analysis of the ratios of SoNar fluorescence. The mean fluorescence intensity (MFI) at excitation of 405 and 488 were quantified (n=5). (D) Frequencies of different lineages, including T cells (CD3e<sup>+</sup>), B cells (B220<sup>+</sup>), myeloid cells (Mac-1<sup>+</sup>Gr-1<sup>+</sup>), and erythroid cells (Ter119<sup>+</sup>), were evaluated in CD45<sup>+</sup> SoNar-high, -mid and -low BM hematopoietic cells (n=8). (E) CD45<sup>+</sup> SoNar-high, -mid or -low BM cells along with CD45.1 competitor cells were transplanted into mice, followed by the analysis of the repopulation at 4, 8 and 16 weeks post-transplant (n=3 for SoNar-high group, n=7 for SoNar-mid group, n=3 for SoNar-low group). (F) Multilineage contribution of donor cells in the recipients at 16 weeks post-transplant (n=3 for SoNar-high group, n=7 for SoNar-mid group, n=3 for SoNar-low group). (G and H) The repopulated donor cells were analyzed in recipients transplanted with SoNar-high, -mid and -low FL-HSCs (G) or adult-HSCs (H) at 4, 8 and 16 weeks after transplantation (n=5). Data are represented as mean ± SEM. One-way ANOVA with Tukey's multiple comparison test (B), and two-way ANOVA with Sidak's multiple comparison test were used for the comparison of statistical significance (D-H). \*, p<0.05; \*\*, p<0.01; \*\*\*, p<0.001.

# Figure S6

## A

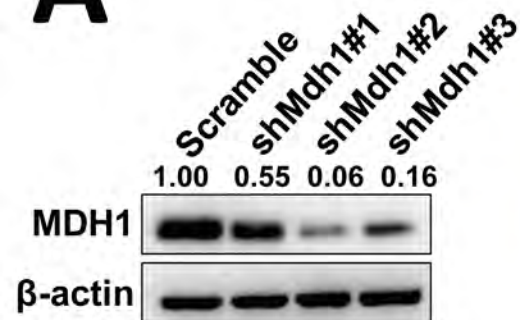

## B

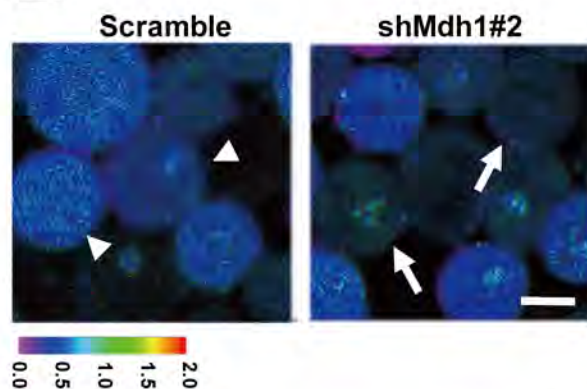

## C

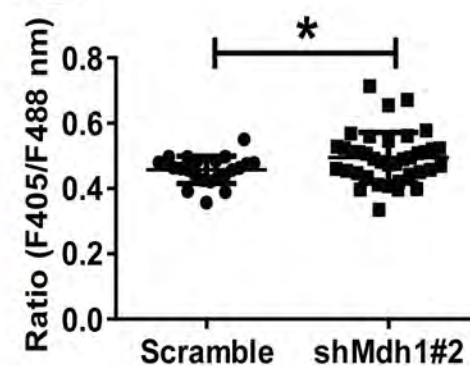

## D

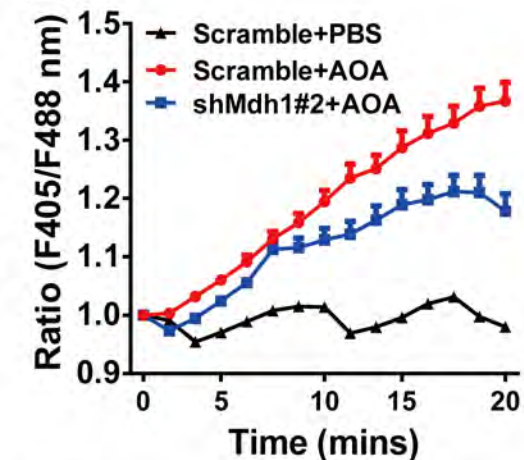

## E

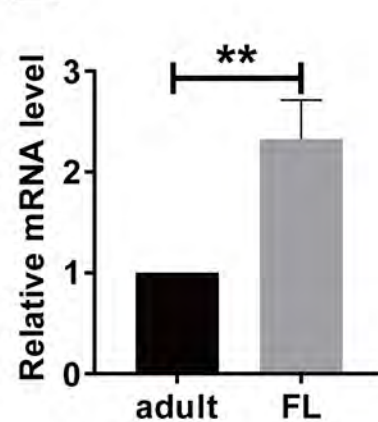

## F

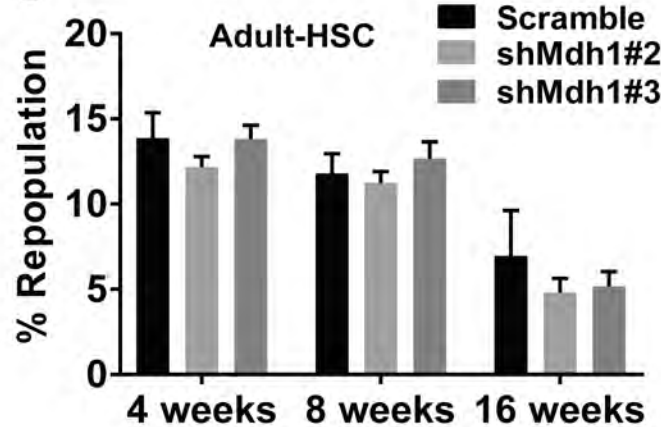

## G

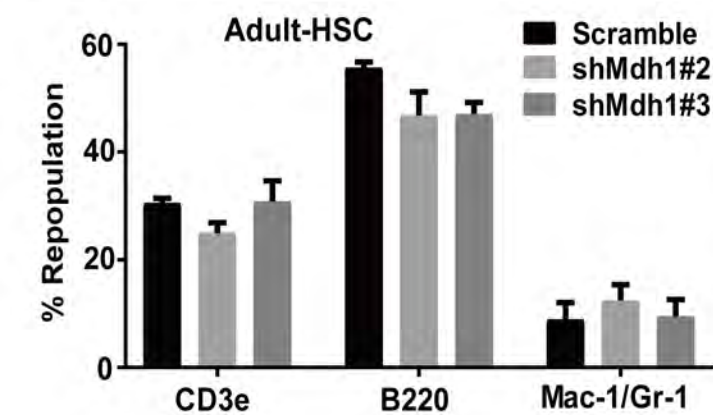

## H

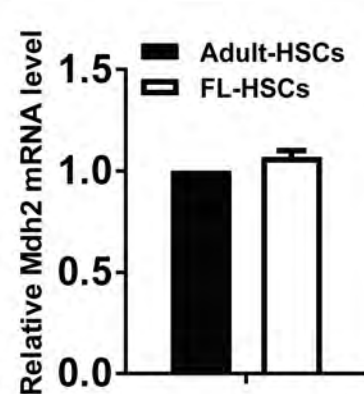

## I

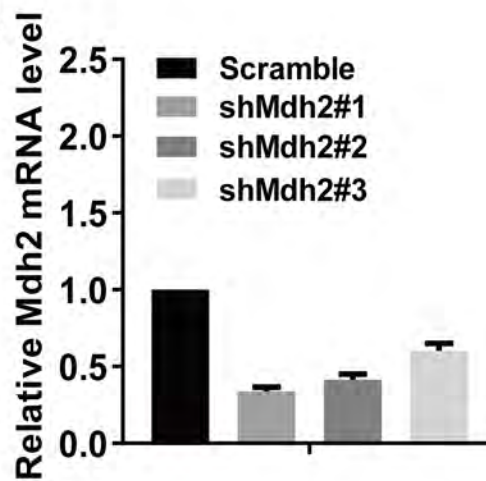

## J

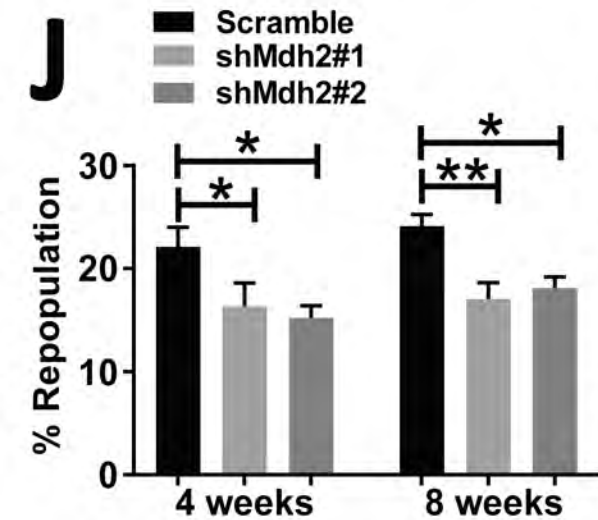

## K

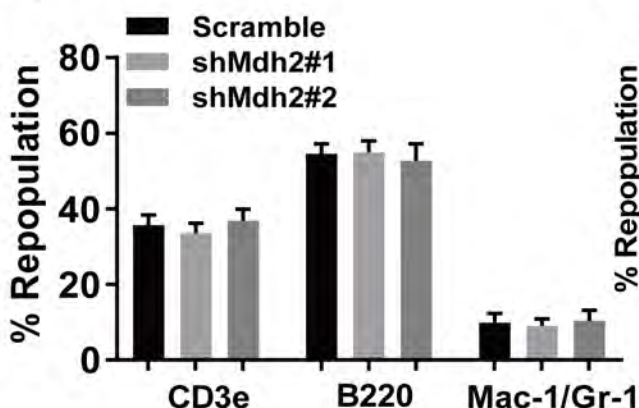

## L

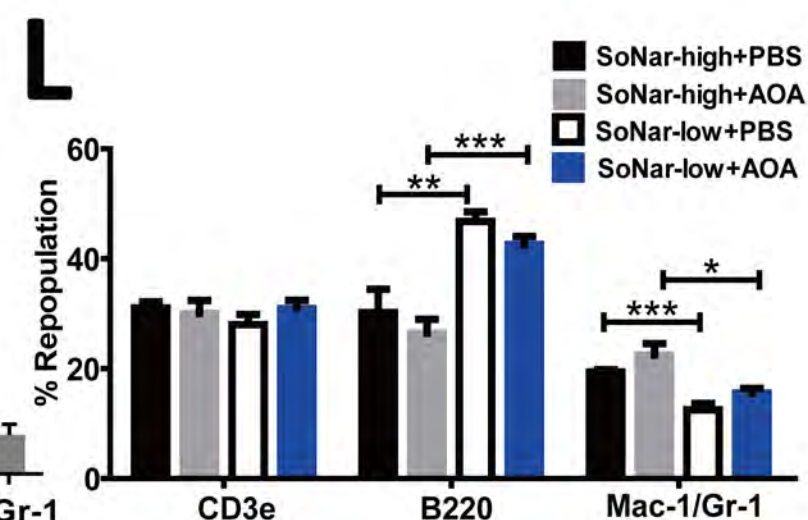

**Figure S6, related to Figure 6.** (A) Knockdown efficiency of shRNAs targeting *Mdh1* (shMdh1#1-#3) was determined in 32D cells by immunoblotting. (B) Representative images for the ratios of SoNar fluorescence of *Mdh1*-knockdown and scrambled SoNar FL-HSCs. Arrowheads or arrows indicate SoNar-low and -high cells, respectively. Scale bar: 10  $\mu$ m. (C) Quantification of the ratios of SoNar in panel B. A total of 25-40 SoNar FL-HSCs were analyzed. (D) Quantification of the ratios of SoNar fluorescence in SoNar FL-HSCs at indicated time points upon AOA incubation. A total of 25-40 SoNar FL-HSCs cells were analyzed. (E-F) *Mdh1* was silenced in CD45<sup>+</sup> BM hematopoietic cells by shRNA targeting *Mdh1* (shMdh1#2 or shMdh1#3) followed by transplantation into recipients. The repopulation was analyzed at 4, 8 and 16 weeks post-transplant (n=5). (G) Multilineage contribution of donor cells in the recipients at 16 weeks post-transplant (n=5). (H) Relative mRNA levels of *Mdh2* in FL-HSCs or adult-HSCs as determined by quantitative RT-PCR (n=3). (I) Knockdown efficiencies of shRNAs targeting to *Mdh2* (shMdh2#1-#3) were determined in L1210 cells by qRT-PCR (n=3). (J-K) *Mdh2* was silenced in CD45<sup>+</sup> BM hematopoietic cells by shRNA targeting *Mdh2* (shMdh2#1 or shMdh2#2) followed by transplantation into recipients. The repopulation was analyzed at 4 and 8 weeks post-transplant (J, n=5). Multilineage contribution of donor cells in the recipients at 8 weeks post-transplant in panel J are shown (K, n=5). (L) Multilineage contribution of donor cells in the recipients receiving SoNar-high and -low FL hematopoietic cells with AOA treatment at 16 weeks post-transplant (n=5). Data are represented as mean  $\pm$  SEM. Student's two-tailed unpaired t test (C and E) or two-way ANOVA with Sidak's multiple comparison test (F, G, J, K and L) was



used for the comparison of statistical significance. \*,  $p < 0.05$ ; \*\*,  $p < 0.01$ ; \*\*\*,  $p < 0.001$ .

# Figure S7

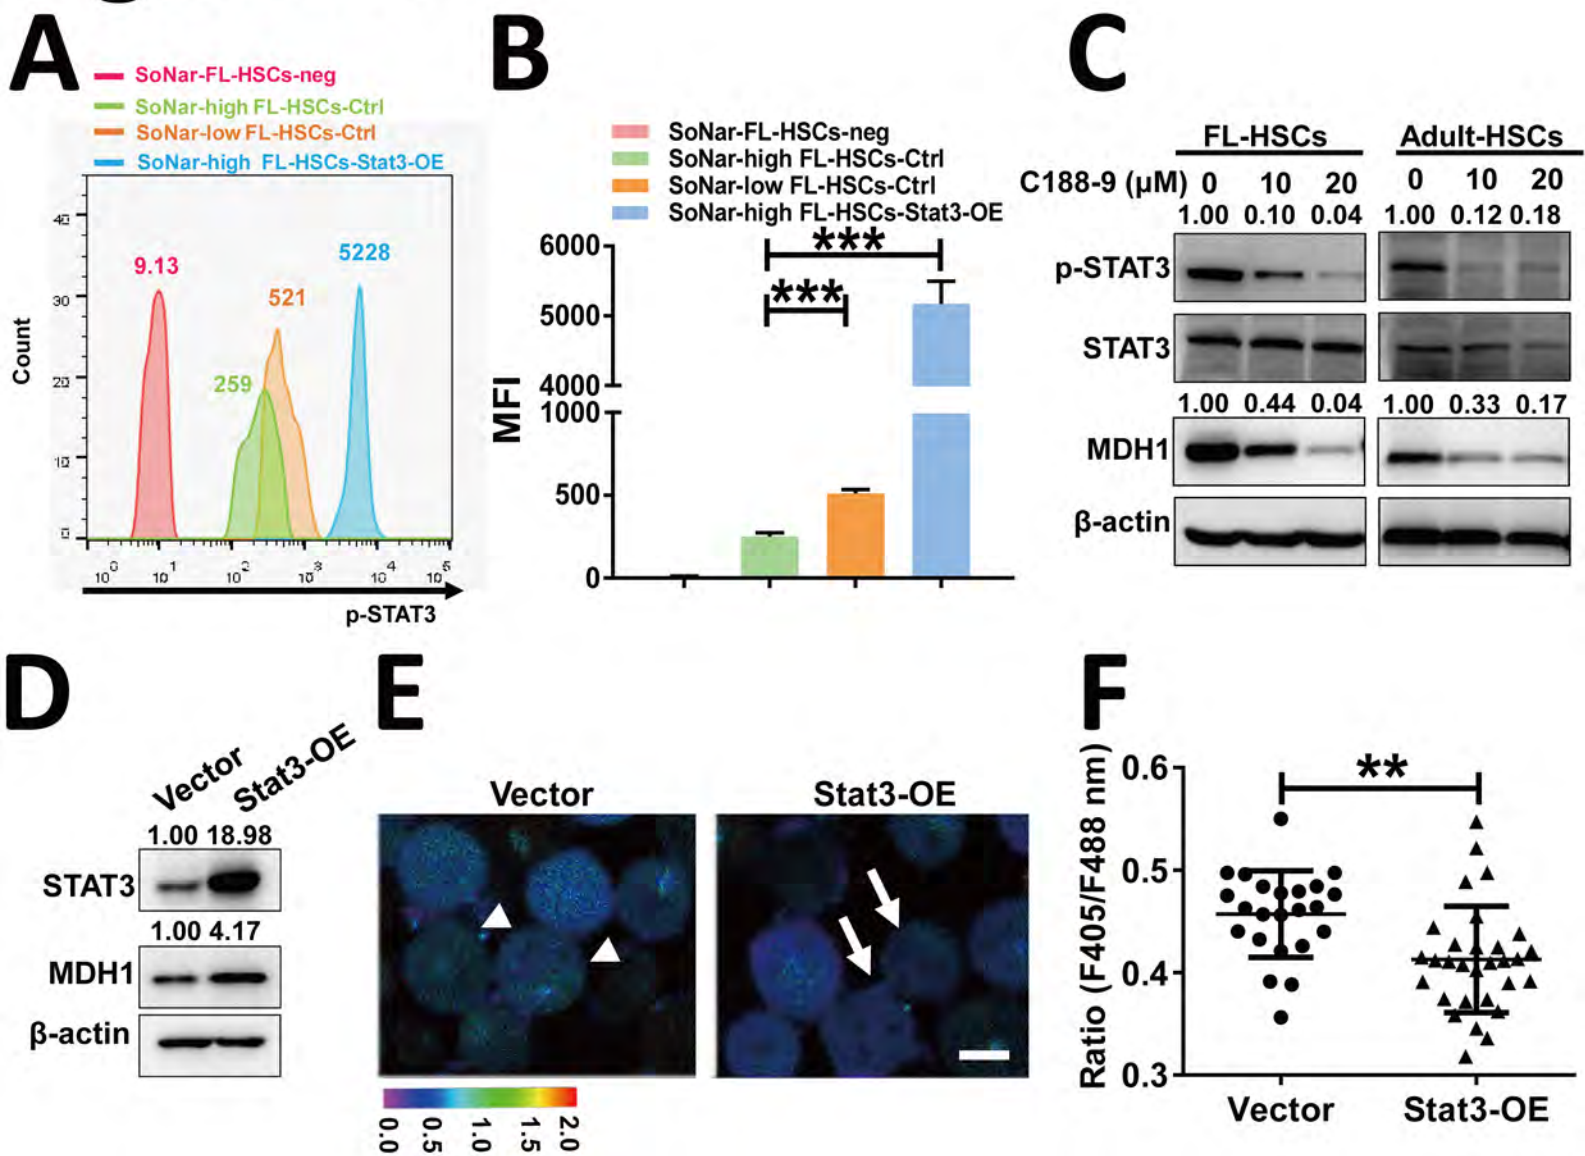

**Figure S7, related to Figure 7. (A)** Representative flow cytometric analysis of intracellular level of p-STAT3 of *Stat3*-overexpression SoNar-high FL-HSCs as compared to SoNar-low FL-HSCs. Ctrl, overexpression with control vector; neg, negative control. **(B)** Quantification data of mean fluorescence intensity (MFI) are shown (n=3). **(C)** The p-STAT3 and MDH1 level was examined in FL-HSCs or adult-HSCs after STAT3 inhibitor treatment with indicated doses by immunoblotting. Ratio of p-STAT3/STAT3, or MDH1/actin was quantified and normalized against untreated cells. **(D)** Protein level of MDH1 was measured in *Stat3*-overexpressed SoNar FL-HSCs and control cells by immunoblotting. Ratio of STAT3/actin, or MDH1/actin was quantified and normalized against control cells (vector). **(E)** *Stat3*-overexpressed SoNar FL-HSCs (*Stat3*-OE) and control cells (vector) were evaluated for the ratios of SoNar fluorescence and representative images are shown. Arrowheads or arrows indicate SoNar-high and -low cells, respectively. Scale bar: 10  $\mu$ m. **(F)** Quantification of the ratios of SoNar fluorescence in panel E. A total of 25-30 SoNar FL-HSCs were analyzed. Data are represented as mean  $\pm$  SEM. Student's two-tailed unpaired t test (F) or one-way ANOVA with Tukey's multiple comparison test (B) was used for the comparison of statistical significance. \*\*, p<0.01; \*\*\*, p<0.001.
